# Supplementary material
Source: PubMed Central journal article supplement (PMC11105741)
Supplement: 18_2019_3115_MOESM1_ESM.pdf [file 18_2019_3115_MOESM1_ESM.pdf]

## Supporting Information

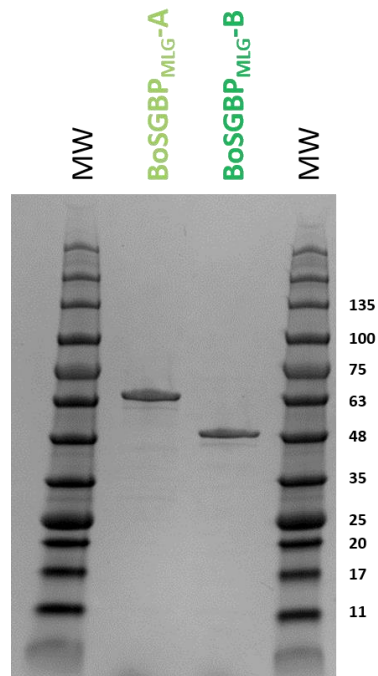

**Figure S1.** Recombinant proteins. SDS-PAGE of purified SGBPs with molecular weight (MW) ladders on either side; ladder band sizes are on the right in kilodaltons (kDa). The calculated expected molecular weights are 62.5 kDa for BoSGBP<sub>MLG-A</sub> and 45.5 kDa for BoSGBP<sub>MLG-B</sub>.

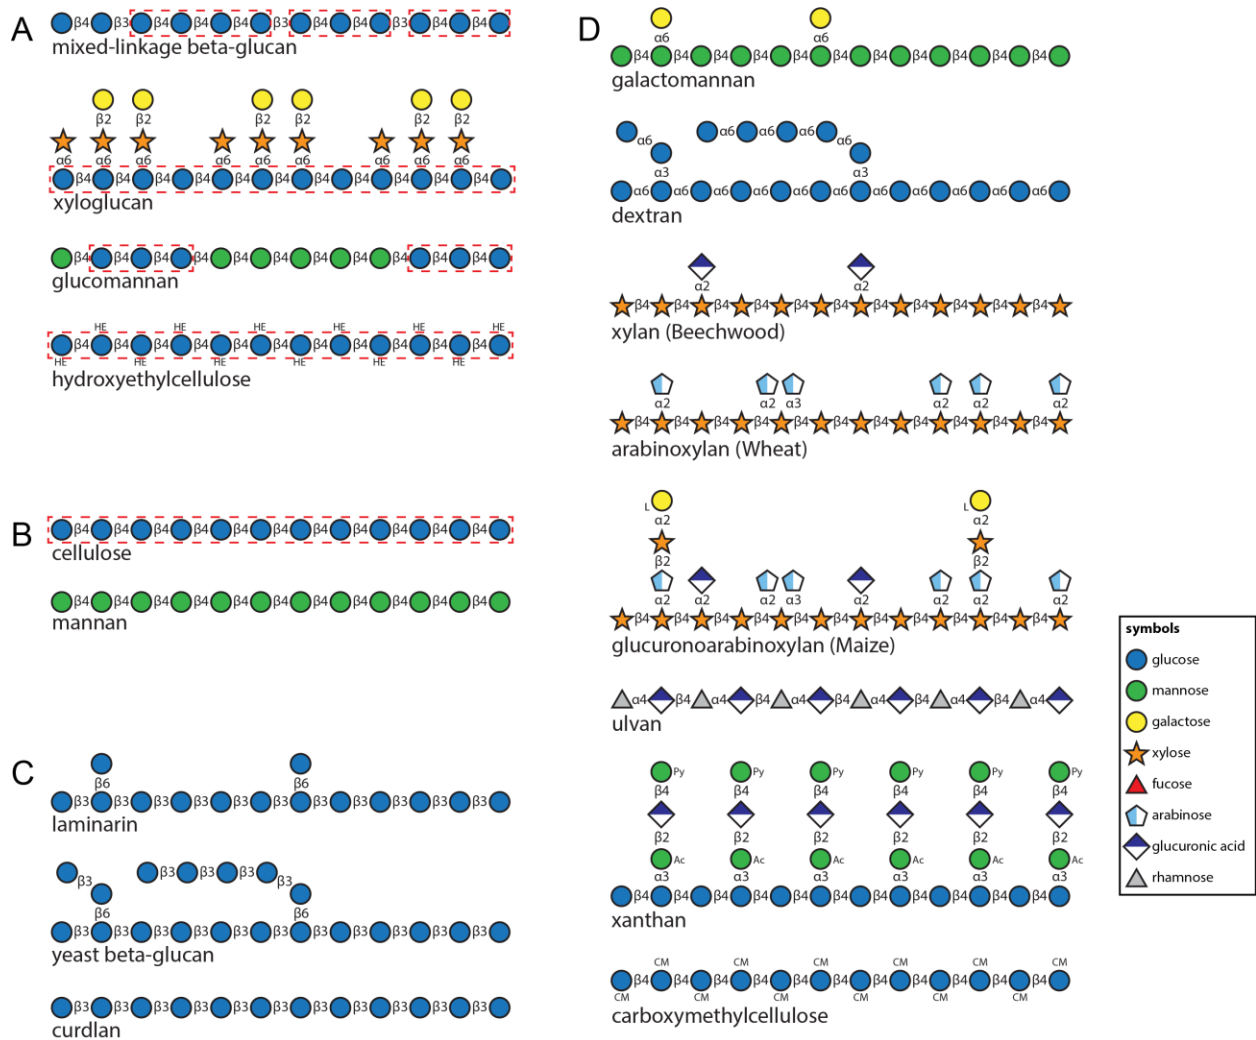

**Figure S2.** Structures of polysaccharides. (A) Polysaccharides that BoSGBP<sub>MLG-A</sub> and BoSGBP<sub>MLG-B</sub> bind (B) Insoluble polysaccharides. (C) Other  $\beta$ -glucans tested that BoSGBP<sub>MLG-A</sub> and BoSGBP<sub>MLG-B</sub> did not bind. (D) Other polysaccharides tested that BoSGBP<sub>MLG-A</sub> and BoSGBP<sub>MLG-B</sub> did not bind. The dashed red boxes highlight the  $\beta(1,4)$ -linked glucose units in the backbone, which are common to all polysaccharides that BoSGBP<sub>MLG-A</sub> and BoSGBP<sub>MLG-B</sub> bind.

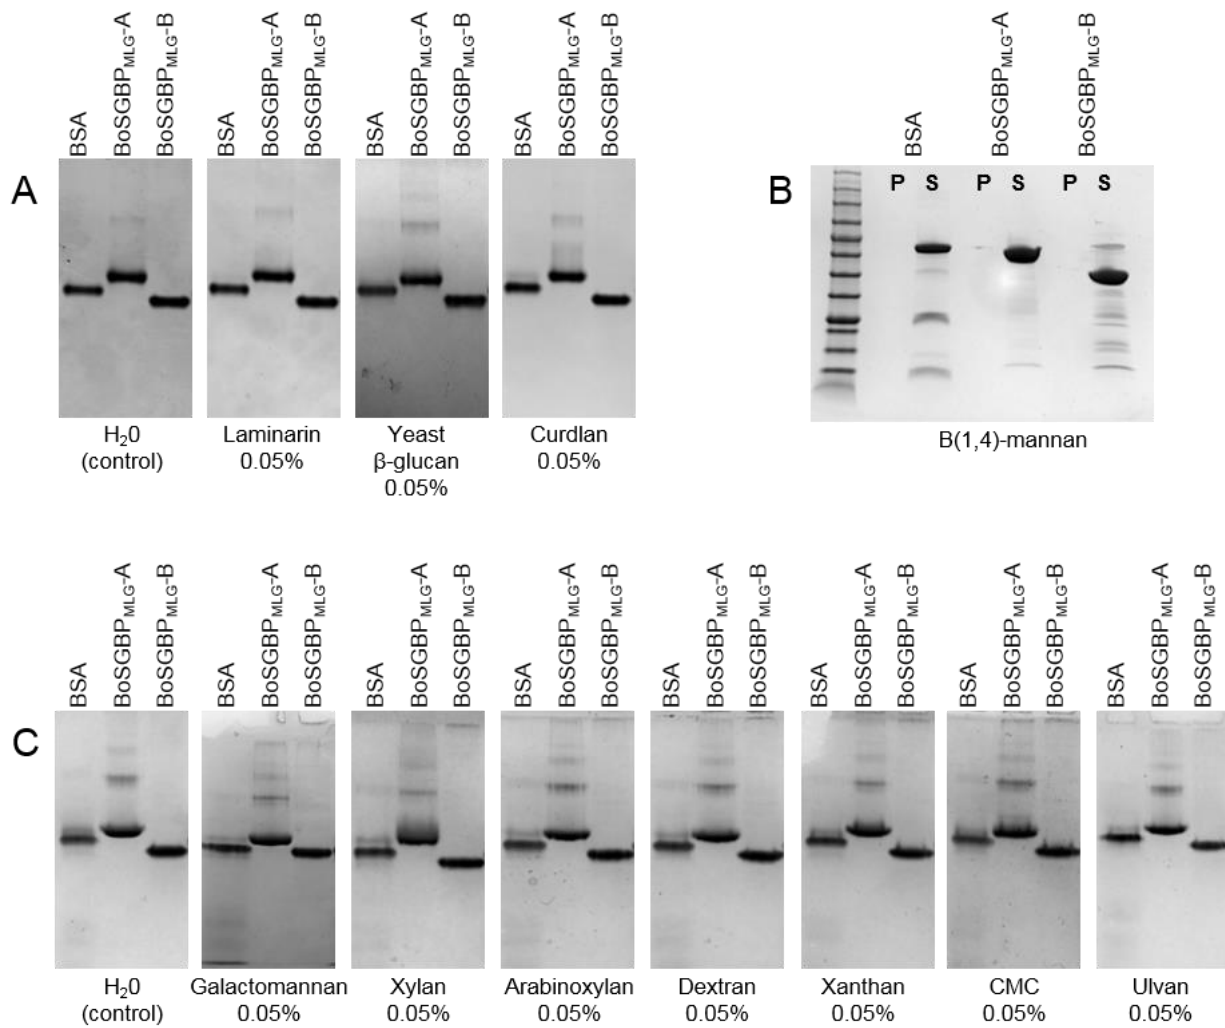

**Figure S3.** BoSGBP<sub>MLG-A</sub> and BoSGBP<sub>MLG-B</sub> non-binding polysaccharides. (A) Affinity electrophoresis gels against  $\beta(1,3)$ -glucans. (B) SDS-PAGE of pull-down assay against insoluble mannan. (C) Affinity electrophoresis gels against various other polysaccharides.

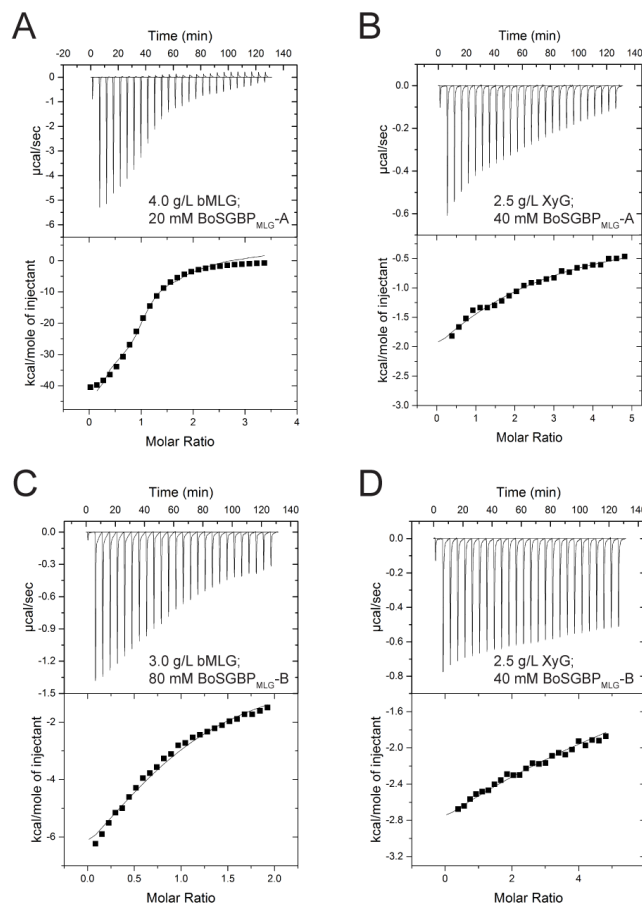

**Figure S4.** Representative isothermal titration calorimetry (ITC) results for BoSGBP<sub>MLG</sub>-A and BoSGBP<sub>MLG</sub>-B with bMLG and XyG. All titrations were performed in 50 mM Sodium Phosphate pH 7.0 with the exception of BoSGBP<sub>MLG</sub>-B with bMLG (performed in 10 mM HEPES pH 7.0) and at 25 °C. In each case, the upper graph shows the raw heat signal for the 10  $\mu$ L injections of carbohydrate into protein; the bottom graph shows the integrated heats and, where appropriate, fits to a 1:1 binding model. Concentrations of the protein and glycan are indicated in the figure. (A) BoSGBP<sub>MLG</sub>-A with bMLG, (B) BoSGBP<sub>MLG</sub>-A with XyG, (C) BoSGBP<sub>MLG</sub>-B with bMLG, (D) BoSGBP<sub>MLG</sub>-B with XyG.

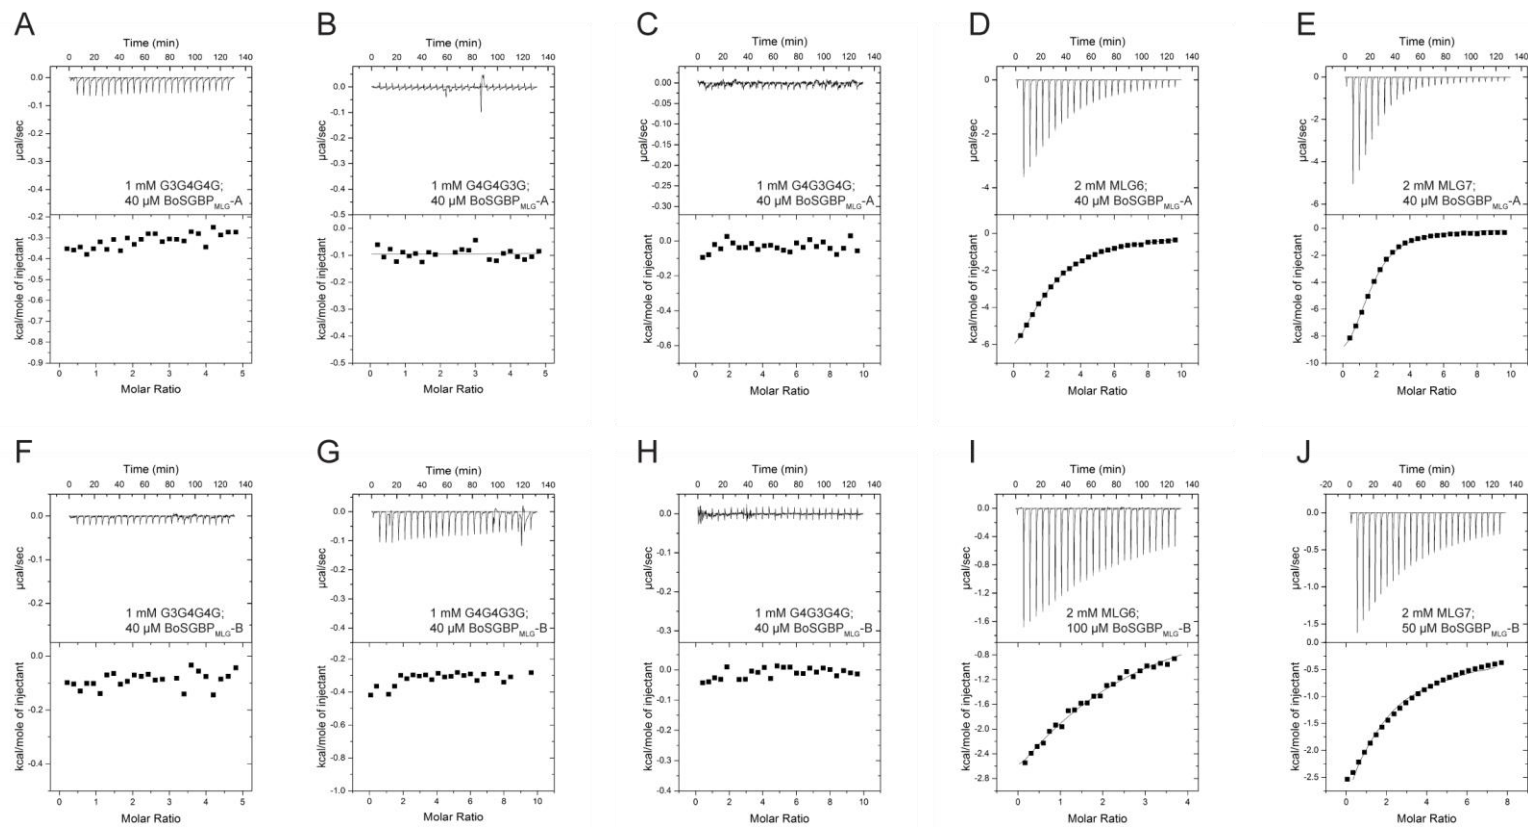

**Figure S5.** Representative ITC results for BoSGBP<sub>MLG-A</sub> and BoSGBP<sub>MLG-B</sub> with MLG oligosaccharides. All titrations were performed in 50 mM Sodium Phosphate pH 7.0 and at 25 °C. In each case, the upper graph shows the raw heat signal for the 10  $\mu$ L injections of carbohydrate into protein; the bottom graph shows the integrated heats and, where appropriate, fits to a 1:1 binding model. Concentrations of the protein and glycan are indicated in the figure. (A) BoSGBP<sub>MLG-A</sub> with G3G4G4G, (B) BoSGBP<sub>MLG-A</sub> with G4G4G3G, (C) BoSGBP<sub>MLG-A</sub> with G4G3G4G, (D) BoSGBP<sub>MLG-A</sub> with MLG6, (E) BoSGBP<sub>MLG-A</sub> with MLG7, (F) BoSGBP<sub>MLG-B</sub> with G3G4G4G, (G) BoSGBP<sub>MLG-B</sub> with G4G4G3G, (H) BoSGBP<sub>MLG-B</sub> with G4G3G4G, (I) BoSGBP<sub>MLG-B</sub> with MLG6, (J) BoSGBP<sub>MLG-B</sub> with MLG7.

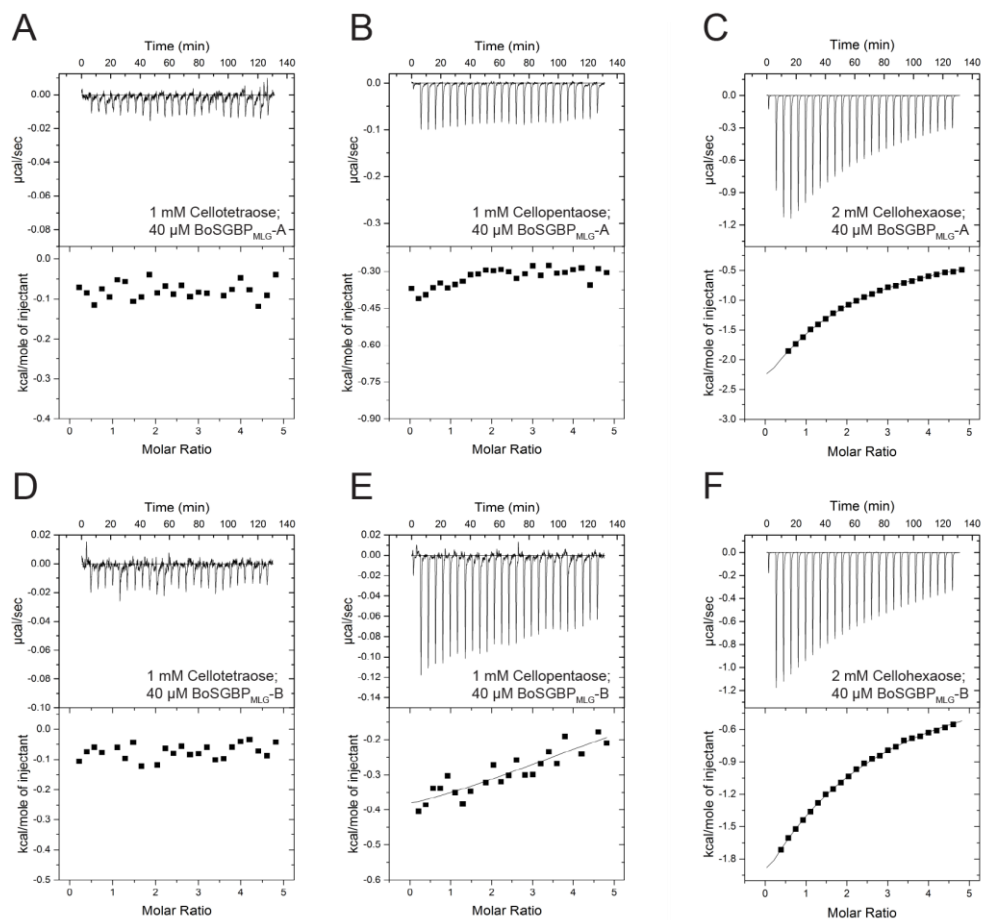

**Figure S6.** Representative ITC results for BoSGBP<sub>MLG-A</sub> and BoSGBP<sub>MLG-B</sub> with celooligosaccharides. All titrations were performed in 50 mM Sodium Phosphate pH 7.0 and at 25 °C. In each case, the upper graph shows the raw heat signal for the 10 µL injections of carbohydrate into protein; the bottom graph shows the integrated heats and, where appropriate, fits to a 1:1 binding model. Concentrations of the protein and glycan are indicated in the figure. (A) BoSGBP<sub>MLG-A</sub> with cellotetraose, (B) BoSGBP<sub>MLG-A</sub> with cellopentaose, (C) BoSGBP<sub>MLG-A</sub> with cellohexaose, (D) BoSGBP<sub>MLG-B</sub> with cellotetraose, (E) BoSGBP<sub>MLG-B</sub> with cellopentaose (F) BoSGBP<sub>MLG-B</sub> with cellohexaose.

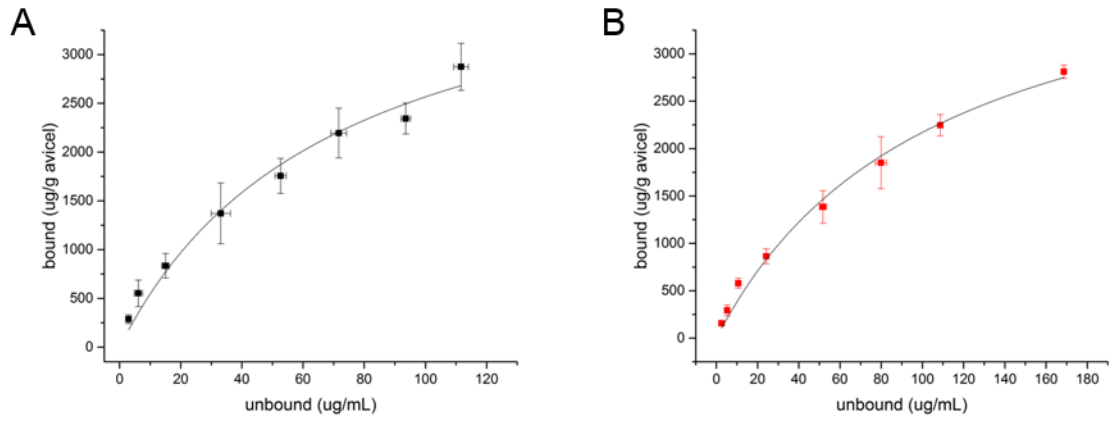

**Figure S7.** Avicel depletion isotherm for (A) GFP-BoSGBP<sub>MLG</sub>-A and (B) GFP-BoSGBP<sub>MLG</sub>-B. The dissociation constants ( $K_d$ ) extracted from curve fitting (see methods for details) are  $49.1 \pm 13.1 \mu\text{M}$  and  $117.4 \pm 21.0 \mu\text{M}$  for GFP-BoSGBP<sub>MLG</sub>-A and GFP-BoSGBP<sub>MLG</sub>-B, respectively. Corresponding association constants ( $K_a$ ) are  $2.04 (\pm 0.54) \times 10^4 \text{ M}^{-1}$  and  $8.52 (\pm 1.50) \times 10^3 \text{ M}^{-1}$  respectively for GFP-BoSGBP<sub>MLG</sub>-A and GFP-BoSGBP<sub>MLG</sub>-B.

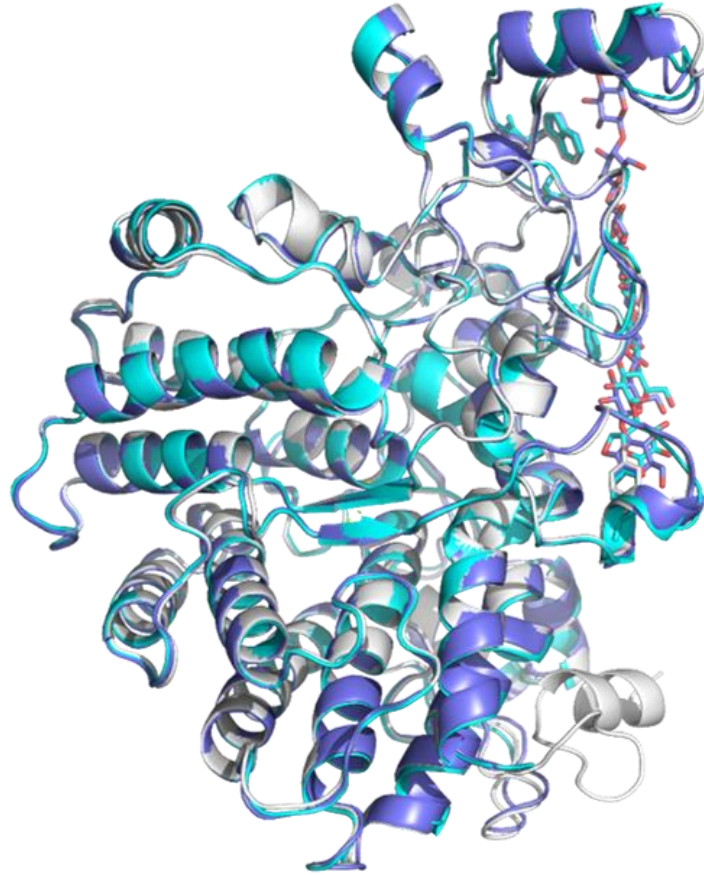

**Figure S8.** Overlay of BoSGBP<sub>MLG-A</sub> secondary structures. Unliganded structure in white, cellohexaose complex in cyan, and MLG7 complex in slate show no major conformational differences with each other. Electron density for an extra 19 N-terminal residues were resolved only in the high resolution (1.50 Å, 6E60) unliganded structure, a portion of which folds into a short  $\alpha$ -helix. Because this extra resolved density is involved in crystal contact with the binding platform of a symmetry-related molecule not present in either of the complex structures (6DMF and 6E61), includes a part of the non-native recombinant sequence, and is a part of the sequence that is believed to form a disordered linker between the globular fold of the protein and the phospholipid to which it is anchored, we interpret this extra ordered structure (in particular the  $\alpha$ -helix) to be a crystal artifact.



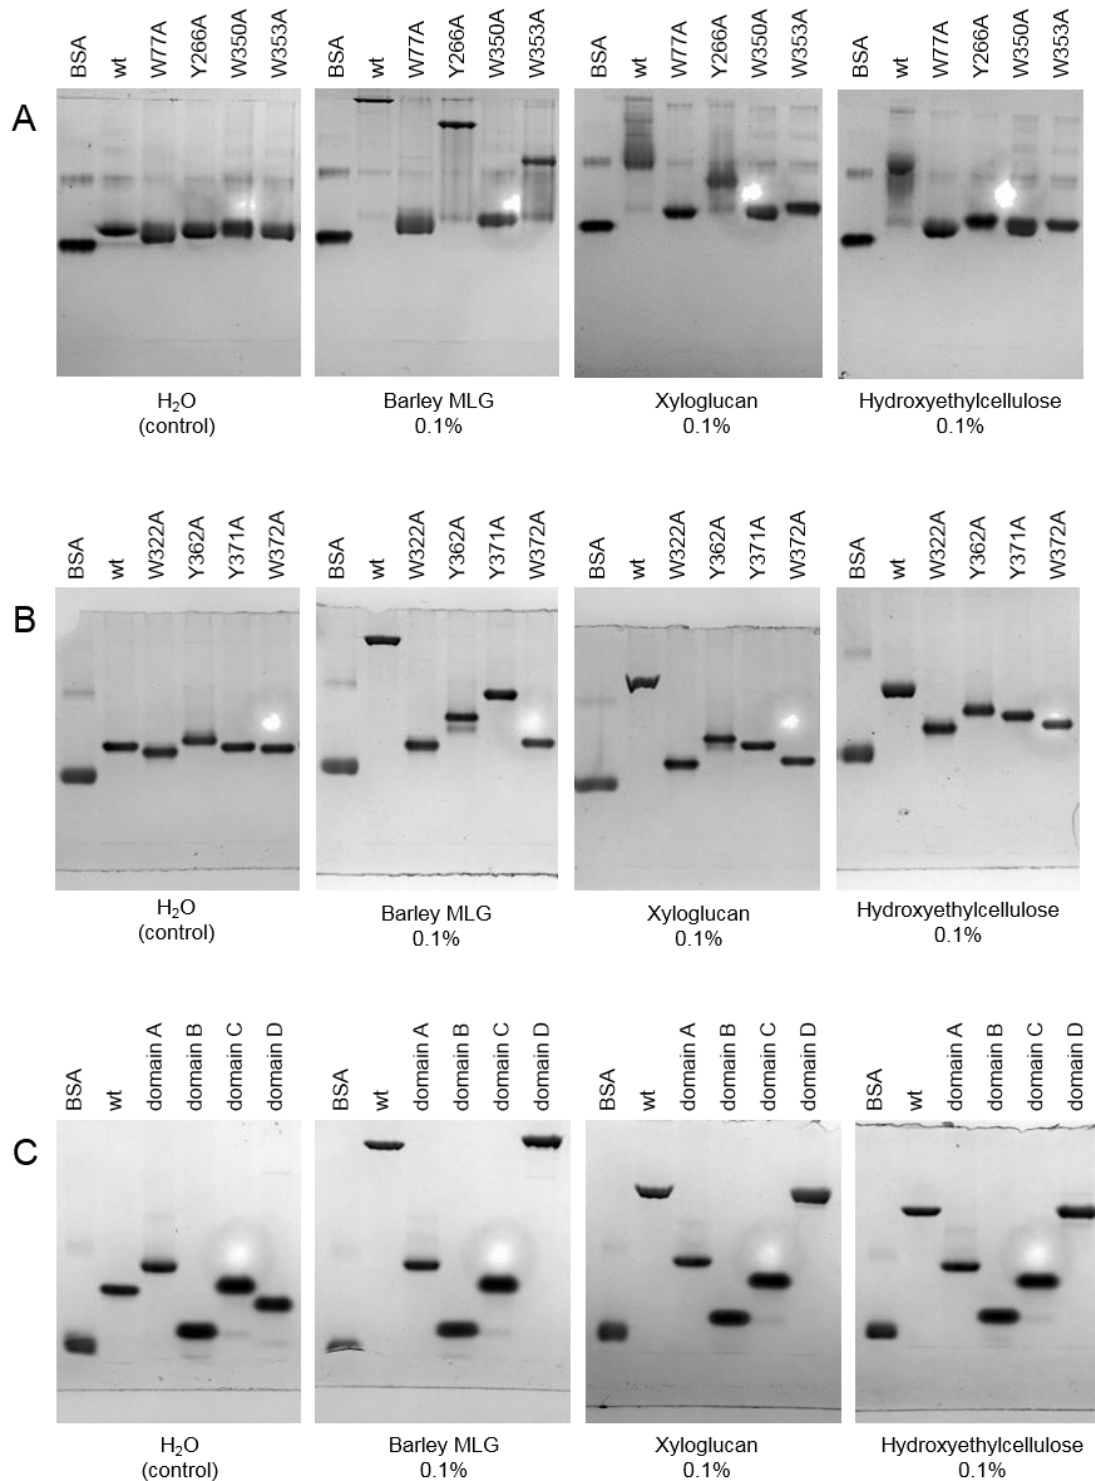

**Figure S9.** Affinity electrophoresis gels of site directed mutants and domain dissections on various polysaccharides. (A) BoSGBP<sub>MLG</sub>-A binding platform site-directed mutants, (B) BoSGBP<sub>MLG</sub>-B binding platform site-directed mutants, (C) BoSGBP<sub>MLG</sub>-B domains. To facilitate comparison, the water and bMLG gels in panel A is identical to that shown in Fig. 3F, while those in panels B and C are identical to those shown in Fig. 4E.

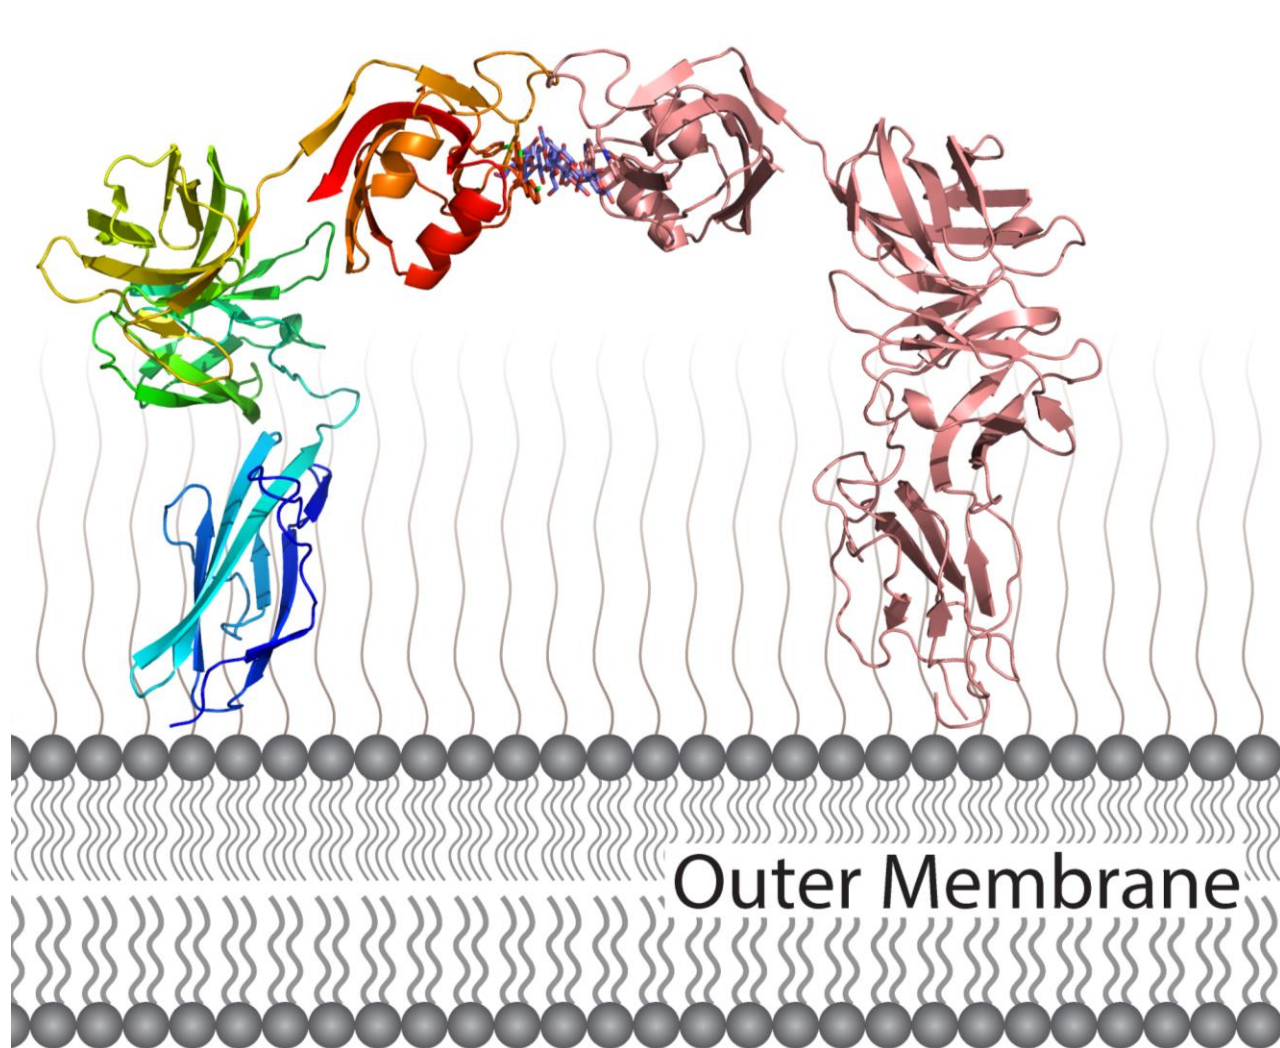

**Figure S10.** Representation of a single MLG7 ligand bound by two molecules of BoSGBP<sub>MLG-B</sub> at the cell surface, based on crystallographic data (PDB ID 6E9B). The molecule on the left is color ramped from blue (N-terminus) to red (C-terminus), the symmetry related molecule on the right is colored salmon and the shared MLG7 ligand in the middle is colored slate. An analogous binding mode was observed for a celohexaose complex (PDB ID 6E57).

## MLGUL TBDT Expression

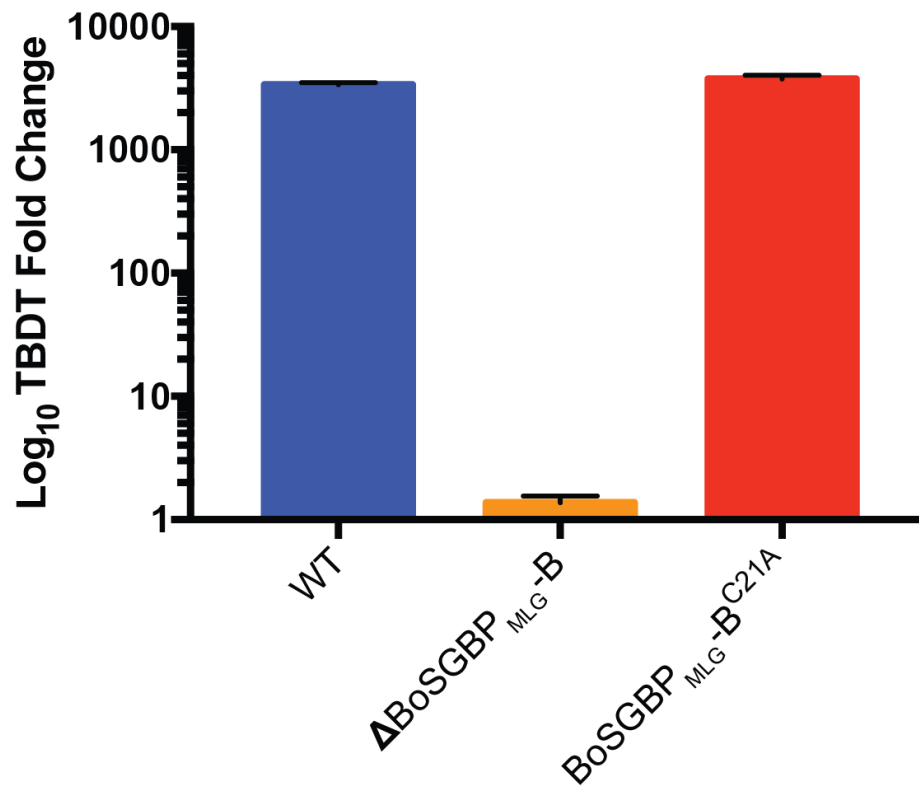

**Figure S11.** Transcriptional analysis of MLGUL TBDT in *BoSGBP*<sub>MLG-B</sub> mutants. Fold change transcriptional response of the MLGUL TBDT from cells grown on MLG (5 mg/mL) vs. glucose (5 mg/mL).

## MLG 0.5 mg/mL

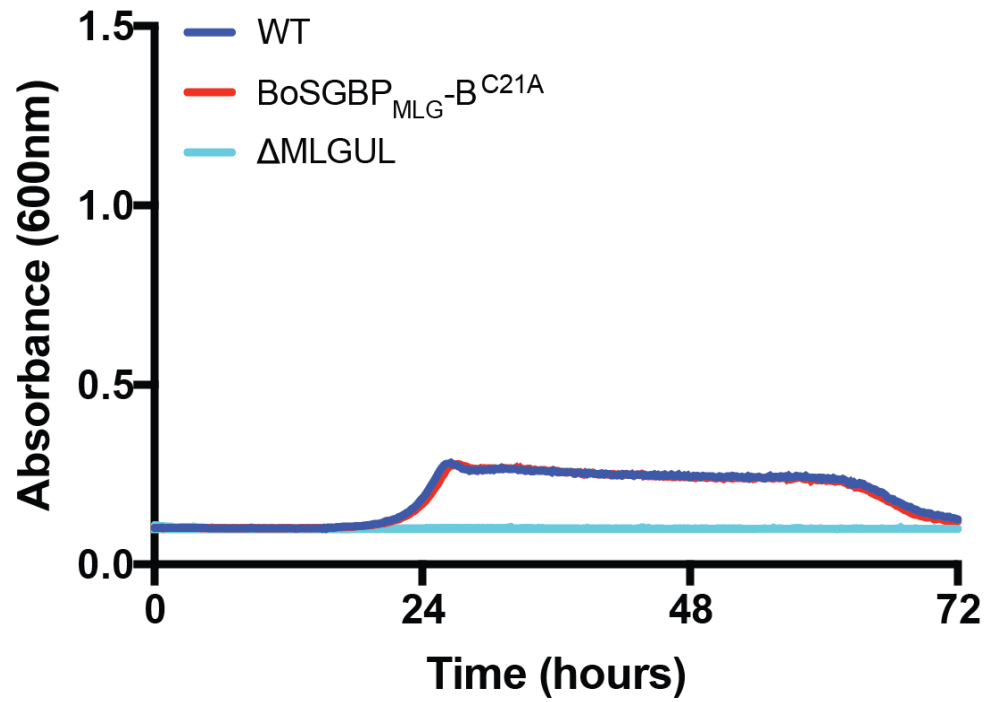

**Figure S12.** Average growth of *B. ovatus* on 0.5 mg/mL MLG. Limited (low maximum O.D.) or no growth of strains on 0.5 mg/mL MLG.

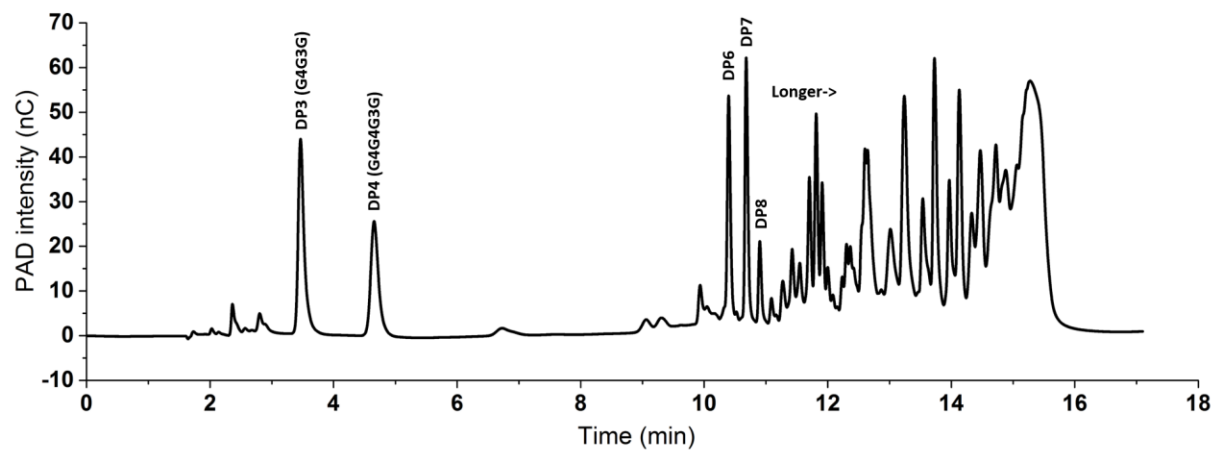

**Figure S13.** MLG partial digest HPLC profile. Controlled hydrolysis of MLG by recombinant BoGH16<sub>MLG</sub> produced a mixture containing predominantly oligosaccharides longer than the limit digest trisaccharide and tetrasaccharide.

## MLG 0.5 mg/mL

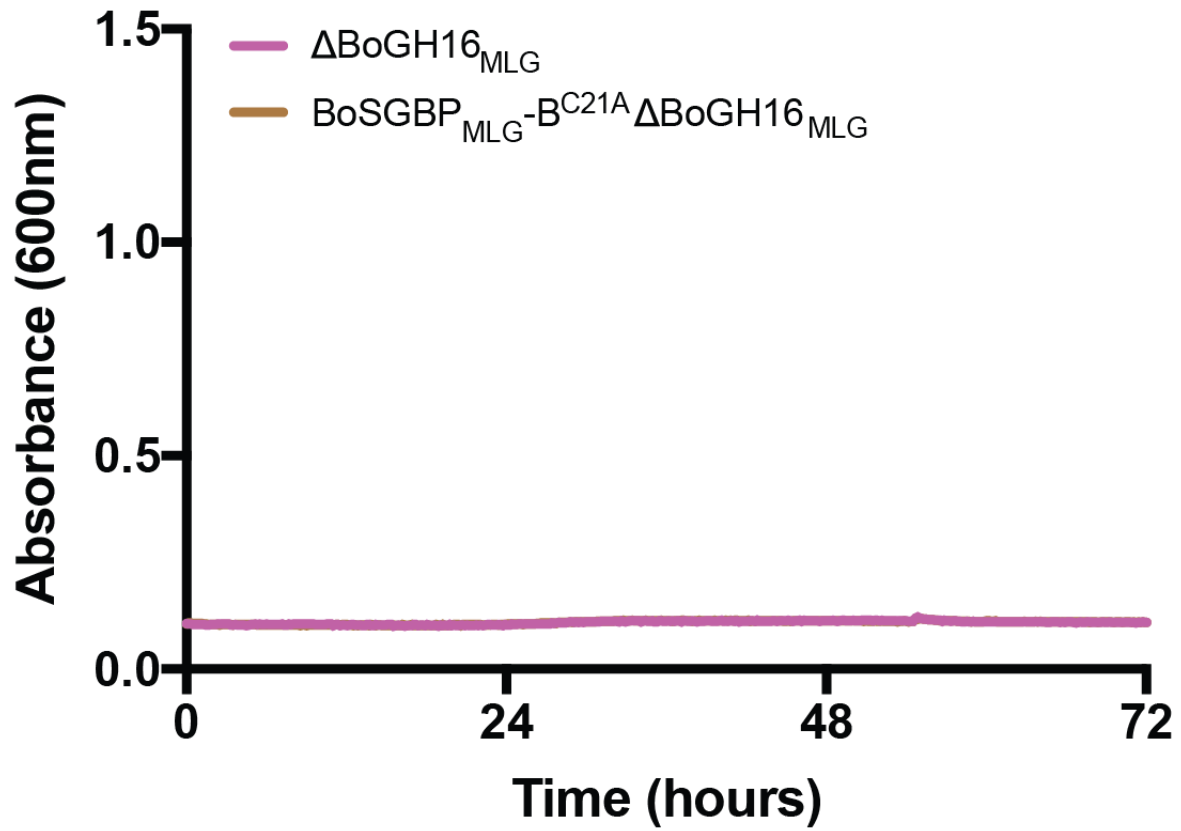

**Figure S14.** Average growth of *B. ovatus* strains lacking vanguard BoGH16 on 5 mg/mL MLG. BoGH16 is required for growth on MLG.

**Table S1. Oligonucleotides used in this study.**

| Primer Name      | Sequence (5'-3')                                 | Use                       |
|------------------|--------------------------------------------------|---------------------------|
| SGBP-A F         | GCGCGCCATATGGATGAATACATGGAAAAC                   | Cloning                   |
| SGBP-A R         | GACGACCTCGAGTTAGTTTTAGTATCCCA                    | Cloning                   |
| SGBP-A W77A F    | CCGTAGTTGGTGGTTCGCACATCCCATCAGTTGTTG             | Site-directed mutagenesis |
| SGBP-A W77A R    | CAACAACCTGATGGGATGTGCGAACACCACCAACTACGG          | Site-directed mutagenesis |
| SGBP-A Y266A F   | ATGAATTTCCGCGATAATCAGAGGCAGCTTCTTGCCGAAACTAAATG  | Site-directed mutagenesis |
| SGBP-A Y266A R   | CATTTAGTTTCGGACAAGAAGCTGCCTCTGATTATCGCGGAAATTCAT | Site-directed mutagenesis |
| SGBP-A W350A F   | GTAGGCCATGGTTCCGCCGAGTAGGCACCTGG                 | Site-directed mutagenesis |
| SGBP-A W350A R   | CCAGGTGCCTACTCGGCCGAACCATGGCCTAC                 | Site-directed mutagenesis |
| SGBP-A W353A F   | CCCTGTAGGCGCTGGTCCCACGAGTAGGC                    | Site-directed mutagenesis |
| SGBP-A W353A R   | GCCTACTCGTGGGAACCAAGCGCTACAGGG                   | Site-directed mutagenesis |
| SGBP-B F         | GAAGAACATATGACCGAGGAAGAACCGTTC                   | Cloning                   |
| SGBP-B R         | GACGACCTCGAGTTATTTACGGTTACCAA                    | Cloning                   |
| SGBP-B W301A F   | CACCGTCCGGCTTATCCGCCGAAACGTAATGGTGTC             | Site-directed mutagenesis |
| SGBP-B W301A R   | GACACCATTACGTTTCGGCGGATAAGCCGGACGGTG             | Site-directed mutagenesis |
| SGBP-B Y341A F   | CAAGCTGCATTTTATGAGCTTCGGCAGTAGGTTCTATGGAGTAG     | Site-directed mutagenesis |
| SGBP-B Y341A R   | CTACTCCATAGAACCTACTGCCGAAGCTCATAAAATGCAGCTTG     | Site-directed mutagenesis |
| SGBP-B Y350A F   | GCCAAGCCTGTCCAAGCGCCTGTGGCAAGCTG                 | Site-directed mutagenesis |
| SGBP-B Y350A R   | CAGCTTGCCACAGGCGCTTGGACAGGCTTGGC                 | Site-directed mutagenesis |
| SGBP-B W351A F   | CTTGCCAAGCCTGTGCATAGCCTGTGGCAAGC                 | Site-directed mutagenesis |
| SGBP-B W351A R   | GCTTGCCACAGGCTATGCGACAGGCTTGGCAAG                | Site-directed mutagenesis |
| SGBP-B domainA R | TTATTACTCGACATCAGCCAACGGATTGAC                   | Cloning                   |
| SGBP-B domainB F | TACTGCCATATGGACCCTCAATCGAAAGAA                   | Cloning                   |
| SGBP-B domainB R | TAGTCGCTCGAGATTGGTACTTTACCAT                     | Cloning                   |
| SGBP-B domainC F | TAGTAGCATATGGCTTCCCTTGTCATTTG                    | Cloning                   |
| SGBP-B domainC R | ATAATACTCGAGGGTAGATACGGTCACAGT                   | Cloning                   |
| SGBP-B domainD F | TCGACGCATATGGAAATAACGCTTTGGTCA                   | Cloning                   |
| GFP-fusion F     | GTCAGCTAGCATGGTTAGCAAAGGTGAAGAA                  | Cloning                   |
| GFP-fusion R     | GATGATGGATCCGCTGCCTTTATACAGTTCATC                | Cloning                   |

|                    |                                                                         |                                       |
|--------------------|-------------------------------------------------------------------------|---------------------------------------|
| SGBP-A_GFP F       | GACGACGGATCCATGGATGAATACATGGAAAAAC                                      | Cloning                               |
| SGBP-A_GFP R       | GACGATCTCGAGTTAGTTTTAGTATCCCACCA                                        | Cloning                               |
| SGBP-B_GFP F       | TATTATGGATCCATGACCGAGGAAGAACCGTTC                                       | Cloning                               |
| SGBP-B_GFP R       | GACGACCTCGAGTTATTTACGGTTACCAAATC                                        | Cloning                               |
| dMLGUL-A UpF       | GAAGATAACATTCGAgtcgacGGTGGCCGCTAAGGTAGGCGAG                             | Deleting SGBP-A                       |
| dMLGUL-A UpR       | GGATGATTGTTTAATAGGATATATCTTTTTAGAATTTACATTTACATTAACCATAGCTTC            | Deleting SGBP-A                       |
| dMLGUL-A DownF     | GTGAAATTCTAAAAAGATATATCCTATTAACAATCATCCATTATGAAAAAGATATATATTGCACTATTTGC | Deleting SGBP-A                       |
| dMLGUL-A DownR     | GGCGGCCGCTCTAGAACTACATACGAGATTGATGCCGAAATGGTCC                          | Deleting SGBP-A                       |
| dMLGUL-B UpF       | GAAGATAACATTCGAgtcgacGGCTGATGAGTGCCACCAGTC                              | Deleting SGBP-B                       |
| dMLGUL-B UpR       | GAATGATTTTTAACTTACTTAGGAACAAATGGATGATTGTTTAATAGTTAGTTTTAGTATCCC         | Deleting SGBP-B                       |
| dMLGUL-B DownF     | CTATTAACAATCATCCATTTGTTCTAAGTAAGTTTTAAAAATCATTACATACCATAAGTATCTGTC      | Deleting SGBP-B                       |
| dMLGUL-B DownR     | GGCGGCCGCTCTAGAACTACTTGAAGCCTCGGACAGCAG                                 | Deleting SGBP-B                       |
| MLGUL-A* UpR       | GGTATTCATGTTTTCCATGTATTCATCGCTGCAAGAAGCGAAAAACAGGGCAC                   | Replacing SGBP-A with SGBP-A*         |
| MLGUL-A* F         | AGCGATGAATACATGGAAAACATGAATACC                                          | Replacing SGBP-A with SGBP-A*         |
| MLGUL-A* R         | TTAGTTTTAGTATCCCACCACAGAAGGC                                            | Replacing SGBP-A with SGBP-A*         |
| MLGUL-A* DownF     | GCCTTCTGTGGTGGGATACTGAAAATACTATTAACAATCATCCATTATGAAAAAG                 | Replacing SGBP-A with SGBP-A*         |
| dGH16 UpF          | GAAAGAAGATAACATTCGAgtcgacGCTGCCGAAGTCTGAAAGAAGG                         | Deleting GH16                         |
| dGH16 UpR          | GCATGTATATTTAAGATTCCGTTTTAGCATTTTAAAGGTTAAACGTAATATGTGC                 | Deleting GH16                         |
| dGH16 DownF2       | CCTTTAAAATGCTAAAACGGAATCTTAAATATACATGCTATGAATATGAAAAATGTAAGTATCTACTG    | Deleting GH16                         |
| dGH16 DownR2       | GGCGGCCGCTCTAGAACTACTGGCACGGCTACCATAAAGTGC                              | Deleting GH16                         |
| MLGUL-B C21A UpF   | GAAAGAAGATAACATTCGAgtcgacGGCTGATGAGTGCCACCAGTC                          | Replacing SGBP-B with C21A allele     |
| MLGUL-B C21A UpR   | CTTCCTCGGTGCATGCAGTAAATGTGGAG                                           | Replacing SGBP-B with C21A allele     |
| MLGUL-B C21A DownF | CTCCACATTTACTGCATGCACCGAGGAAG                                           | Replacing SGBP-B with C21A allele     |
| MLGUL-B C21A DownR | GGCGGCCGCTCTAGAACTACTTGAAGCCTCGGACAGCAG                                 | Replacing SGBP-B with C21A allele     |
| MLGUL TBDT qPCR F  | CTATGTCTGCCCGTCTGCTTAC                                                  | Probing TBDT transcription            |
| MLGUL TBDT qPCR R  | CCGGCTGCCAATCTTTCTTCT                                                   | Probing TBDT transcription            |
| B ovatus 16s F     | GGTAGTCCACACAGTAAACGATGAA                                               | Normalizing transcription to 16s gene |
| B ovatus 16s F     | CCCGTCAATTCCTTTGAGTTTC                                                  | Normalizing transcription to 16s gene |



**Table S2. Privateer validation results**

| <b>Residue Name</b>                                | <b>Conformation</b>         | <b>Average B-factor</b> | <b>RSCC</b> | <b>Diagnostic</b> |
|----------------------------------------------------|-----------------------------|-------------------------|-------------|-------------------|
| <b>BoSGBP<sub>MLG</sub>-A MLG7 complex</b>         |                             |                         |             |                   |
| BGC-1                                              | <sup>4</sup> C <sub>1</sub> | 50.39                   | 0.81        | Ok                |
| BGC-2                                              | <sup>4</sup> C <sub>1</sub> | 35.58                   | 0.9         | Ok                |
| BGC-3                                              | <sup>4</sup> C <sub>1</sub> | 25.89                   | 0.91        | Ok                |
| BGC-4                                              | <sup>4</sup> C <sub>1</sub> | 23.09                   | 0.92        | Ok                |
| BGC-5                                              | <sup>4</sup> C <sub>1</sub> | 23.09                   | 0.91        | Ok                |
| BGC-6                                              | <sup>4</sup> C <sub>1</sub> | 25.22                   | 0.91        | Ok                |
| BGC-7                                              | <sup>4</sup> C <sub>1</sub> | 29.61                   | 0.84        | Ok                |
| BGC-8                                              | <sup>4</sup> C <sub>1</sub> | 46.71                   | 0.78        | Ok                |
| BGC-9                                              | <sup>4</sup> C <sub>1</sub> | 34.56                   | 0.86        | Ok                |
| BGC-10                                             | <sup>4</sup> C <sub>1</sub> | 25.81                   | 0.9         | Ok                |
| BGC-11                                             | <sup>4</sup> C <sub>1</sub> | 24.13                   | 0.89        | Ok                |
| BGC-12                                             | <sup>4</sup> C <sub>1</sub> | 25.42                   | 0.89        | Ok                |
| BGC-13                                             | <sup>4</sup> C <sub>1</sub> | 25.73                   | 0.9         | Ok                |
| BGC-14                                             | <sup>4</sup> C <sub>1</sub> | 28.2                    | 0.83        | Ok                |
| <b>BoSGBP<sub>MLG</sub>-B MLG7 complex</b>         |                             |                         |             |                   |
| BGC-1                                              | <sup>4</sup> C <sub>1</sub> | 105.22                  | 0.36        | Ok                |
| BGC-2                                              | <sup>4</sup> C <sub>1</sub> | 65.6                    | 0.78        | Ok                |
| BGC-3                                              | <sup>4</sup> C <sub>1</sub> | 58.94                   | 0.79        | Ok                |
| BGC-4                                              | <sup>4</sup> C <sub>1</sub> | 62.14                   | 0.73        | Ok                |
| BGC-5                                              | <sup>4</sup> C <sub>1</sub> | 63.7                    | 0.71        | Ok                |
| BGC-6                                              | <sup>4</sup> C <sub>1</sub> | 74.5                    | 0.63        | Ok                |
| BGC-7                                              | <sup>4</sup> C <sub>1</sub> | 94.15                   | 0.34        | Ok                |
| <b>BoSGBP<sub>MLG</sub>-A cellohexaose complex</b> |                             |                         |             |                   |
| BGC-1                                              | <sup>4</sup> C <sub>1</sub> | 60.1742                 | 0.85        | Ok                |
| BGC-2                                              | <sup>4</sup> C <sub>1</sub> | 50.3745                 | 0.93        | Ok                |
| BGC-3                                              | <sup>4</sup> C <sub>1</sub> | 46.6764                 | 0.89        | Ok                |
| BGC-4                                              | <sup>4</sup> C <sub>1</sub> | 37.11                   | 0.93        | Ok                |
| BGC-5                                              | <sup>4</sup> C <sub>1</sub> | 43.7827                 | 0.87        | Ok                |
| BGC-6                                              | <sup>4</sup> C <sub>1</sub> | 58.41                   | 0.79        | Ok                |
| BGC-7                                              | <sup>4</sup> C <sub>1</sub> | 46.1691                 | 0.91        | Ok                |
| BGC-8                                              | <sup>4</sup> C <sub>1</sub> | 37.44                   | 0.9         | Ok                |
| BGC-9                                              | <sup>4</sup> C <sub>1</sub> | 33.8336                 | 0.93        | Ok                |
| BGC-10                                             | <sup>4</sup> C <sub>1</sub> | 39.5718                 | 0.94        | Ok                |

|        |                             |         |      |    |
|--------|-----------------------------|---------|------|----|
| BGC-11 | <sup>4</sup> C <sub>1</sub> | 47.8636 | 0.83 | Ok |
| BGC-12 | <sup>4</sup> C <sub>1</sub> | 67.5033 | 0.82 | Ok |
| BGC-13 | <sup>4</sup> C <sub>1</sub> | 51.0927 | 0.9  | Ok |
| BGC-14 | <sup>4</sup> C <sub>1</sub> | 43.9373 | 0.92 | Ok |
| BGC-15 | <sup>4</sup> C <sub>1</sub> | 39.58   | 0.93 | Ok |
| BGC-16 | <sup>4</sup> C <sub>1</sub> | 42.3864 | 0.95 | Ok |
| BGC-17 | <sup>4</sup> C <sub>1</sub> | 49.8864 | 0.9  | Ok |
| BGC-18 | <sup>4</sup> C <sub>1</sub> | 62.215  | 0.86 | Ok |
| BGC-19 | <sup>4</sup> C <sub>1</sub> | 56.0618 | 0.89 | Ok |
| BGC-20 | <sup>4</sup> C <sub>1</sub> | 51.0864 | 0.91 | Ok |
| BGC-21 | <sup>4</sup> C <sub>1</sub> | 52.7482 | 0.91 | Ok |
| BGC-22 | <sup>4</sup> C <sub>1</sub> | 56.2327 | 0.91 | Ok |
| BGC-23 | <sup>4</sup> C <sub>1</sub> | 59.2864 | 0.89 | Ok |
| BGC-24 | <sup>4</sup> C <sub>1</sub> | 65.1833 | 0.78 | Ok |
| BGC-25 | <sup>4</sup> C <sub>1</sub> | 52.58   | 0.88 | Ok |
| BGC-26 | <sup>4</sup> C <sub>1</sub> | 42.8782 | 0.92 | Ok |
| BGC-27 | <sup>4</sup> C <sub>1</sub> | 37.2736 | 0.93 | Ok |
| BGC-28 | <sup>4</sup> C <sub>1</sub> | 41.7655 | 0.89 | Ok |
| BGC-29 | <sup>4</sup> C <sub>1</sub> | 41.3182 | 0.9  | Ok |
| BGC-30 | <sup>4</sup> C <sub>1</sub> | 68.6325 | 0.8  | Ok |
| BGC-31 | <sup>4</sup> C <sub>1</sub> | 57.5191 | 0.87 | Ok |
| BGC-32 | <sup>4</sup> C <sub>1</sub> | 63.8582 | 0.83 | Ok |
| BGC-33 | <sup>4</sup> C <sub>1</sub> | 56.5745 | 0.89 | Ok |
| BGC-34 | <sup>4</sup> C <sub>1</sub> | 62.7182 | 0.88 | Ok |
| BGC-35 | <sup>4</sup> C <sub>1</sub> | 70.1945 | 0.86 | Ok |
| BGC-36 | <sup>4</sup> C <sub>1</sub> | 59.9958 | 0.85 | Ok |
| BGC-37 | <sup>4</sup> C <sub>1</sub> | 47.8464 | 0.92 | Ok |
| BGC-38 | <sup>4</sup> C <sub>1</sub> | 44.1164 | 0.92 | Ok |
| BGC-39 | <sup>4</sup> C <sub>1</sub> | 38.3709 | 0.91 | Ok |
| BGC-40 | <sup>4</sup> C <sub>1</sub> | 41.2236 | 0.94 | Ok |
| BGC-41 | <sup>4</sup> C <sub>1</sub> | 45.3373 | 0.85 | Ok |
| BGC-42 | <sup>4</sup> C <sub>1</sub> | 62.9917 | 0.83 | Ok |
| BGC-43 | <sup>4</sup> C <sub>1</sub> | 54.4318 | 0.83 | Ok |
| BGC-44 | <sup>4</sup> C <sub>1</sub> | 50.1036 | 0.84 | Ok |
| BGC-45 | <sup>4</sup> C <sub>1</sub> | 50.4491 | 0.91 | Ok |
| BGC-46 | <sup>4</sup> C <sub>1</sub> | 50.4491 | 0.91 | Ok |

|                                                    |                             |         |      |    |
|----------------------------------------------------|-----------------------------|---------|------|----|
| BGC-47                                             | <sup>4</sup> C <sub>1</sub> | 55.8391 | 0.87 | Ok |
| BGC-48                                             | <sup>4</sup> C <sub>1</sub> | 63.435  | 0.8  | Ok |
| BGC-49                                             | <sup>4</sup> C <sub>1</sub> | 47.2318 | 0.91 | Ok |
| BGC-50                                             | <sup>4</sup> C <sub>1</sub> | 43.8173 | 0.9  | Ok |
| BGC-51                                             | <sup>4</sup> C <sub>1</sub> | 39.7791 | 0.92 | Ok |
| BGC-52                                             | <sup>4</sup> C <sub>1</sub> | 43.8336 | 0.91 | Ok |
| BGC-53                                             | <sup>4</sup> C <sub>1</sub> | 45.1427 | 0.89 | Ok |
| BGC-54                                             | <sup>4</sup> C <sub>1</sub> | 58.5008 | 0.8  | Ok |
| BGC-55                                             | <sup>4</sup> C <sub>1</sub> | 48.9773 | 0.9  | Ok |
| BGC-56                                             | <sup>4</sup> C <sub>1</sub> | 40.7064 | 0.9  | Ok |
| BGC-57                                             | <sup>4</sup> C <sub>1</sub> | 35.0218 | 0.91 | Ok |
| BGC-58                                             | <sup>4</sup> C <sub>1</sub> | 41.4518 | 0.92 | Ok |
| BGC-59                                             | <sup>4</sup> C <sub>1</sub> | 52.3018 | 0.87 | Ok |
| <b>BoSGBP<sub>MLG</sub>-B cellohexaose complex</b> |                             |         |      |    |
| BGC-1                                              | <sup>4</sup> C <sub>1</sub> | 47.1325 | 0.83 | Ok |
| BGC-2                                              | <sup>4</sup> C <sub>1</sub> | 40.6309 | 0.88 | Ok |
| BGC-3                                              | <sup>4</sup> C <sub>1</sub> | 40.0718 | 0.86 | Ok |
| BGC-4                                              | <sup>4</sup> C <sub>1</sub> | 39.8464 | 0.86 | Ok |
| BGC-5                                              | <sup>4</sup> C <sub>1</sub> | 46.6291 | 0.81 | Ok |
| BGC-6                                              | <sup>4</sup> C <sub>1</sub> | 105.583 | 0.16 | Ok |
| BGC-7                                              | <sup>4</sup> C <sub>1</sub> | 93.8809 | 0.54 | Ok |
| BGC-8                                              | <sup>4</sup> C <sub>1</sub> | 86.8264 | 0.61 | Ok |
| BGC-9                                              | <sup>4</sup> C <sub>1</sub> | 79.6155 | 0.73 | Ok |
| BGC-10                                             | <sup>4</sup> C <sub>1</sub> | 80.81   | 0.67 | Ok |
| BGC-11                                             | <sup>4</sup> C <sub>1</sub> | 110.487 | 0.25 | Ok |
| BGC-12                                             | <sup>4</sup> C <sub>1</sub> | 93.9518 | 0.4  | Ok |
| BGC-13                                             | <sup>4</sup> C <sub>1</sub> | 85.1655 | 0.55 | Ok |
| BGC-14                                             | <sup>4</sup> C <sub>1</sub> | 77.7655 | 0.7  | Ok |
| BGC-15                                             | <sup>4</sup> C <sub>1</sub> | 83.9127 | 0.62 | Ok |
